# Supplementary material for: An orthorhombic Mo3VOxcatalyst most active for oxidative dehydrogenation of ethane among related complex metal oxides
Source: Royal Society of Chemistry journal article supplement (doi:10.1039/c2cy20444d), 2012-08-30
Supplement: c2cy20444d.pdf [file c2cy20444d.pdf]

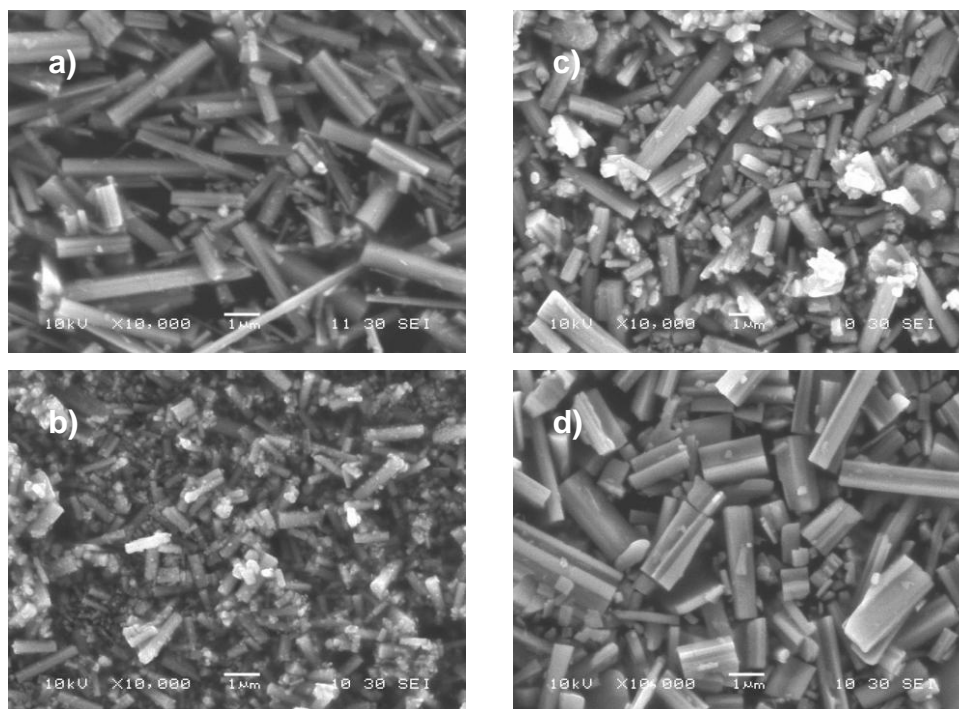

Figure S1 SEM images of ground orthorhombic a), trigonal b), amorphous c), and tetragonal d)  $\text{Mo}_3\text{VO}_x$  samples after catalytic test.

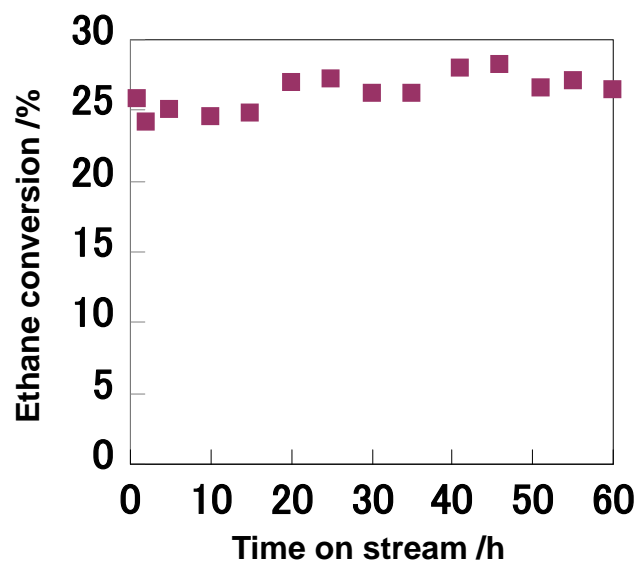

Figure S2 Ethane conversion change as the function of time on stream over the orthorhombic catalysts at 300 °C. The other reaction conditions are the same as those in Figure 6.
